# Supplementary material
Source: PubMed Central journal article supplement (PMC5444970)
Supplement: NIHMS856095-supplement-Supp_Fig_S1.pdf [file NIHMS856095-supplement-Supp_Fig_S1.pdf]

| Case | Pre-ablation CMR<br>(No LGE identified)                                             | Ablation location and 3D<br>electroanatomic map with<br>ablation sites (red dots)    | Post-ablation CMR LGE (white arrows)                                                                                                                 |
|------|-------------------------------------------------------------------------------------|--------------------------------------------------------------------------------------|------------------------------------------------------------------------------------------------------------------------------------------------------|
| 1    | 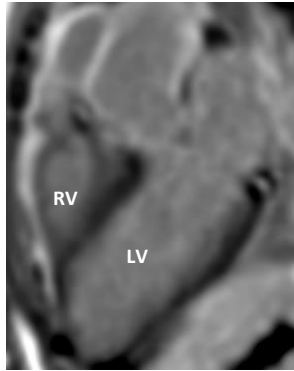   |     |                                                                   |
| 2    |    |     |                                                                   |
| 3    | <p>No pre-ablation CMR</p>                                                          |    |                                                                  |
| 4    |  |  |                                                                 |
| 5    |  |   |  <p>No visible LGE in cross-sectional short/long axis planes</p> |

|    |                                                                                     |                                                                                                                       |                                                                                       |
|----|-------------------------------------------------------------------------------------|-----------------------------------------------------------------------------------------------------------------------|---------------------------------------------------------------------------------------|
| 6  | 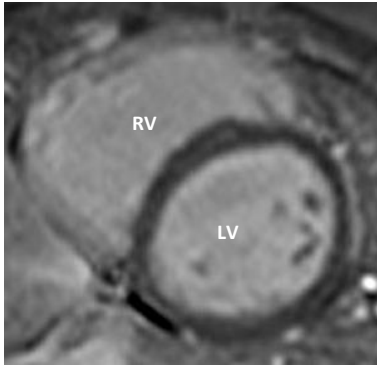    |  <p>Posterior septal LV</p>           |     |
| 7  |    |  <p>Anterior RV</p>                  |    |
| 8  |   |  <p>LV apex</p>                     |   |
| 9* |  |  <p>RVOT and right aortic cusp</p> |  |
| 10 |  |  <p>Septal RVOT</p>                |  |
